# Supplementary material
Source: Springer Nature journal article supplement (https://www.springermedizin.de/resource/supplementary/12943_2014_1448_MOESM4_ESM.pdf/9553036)

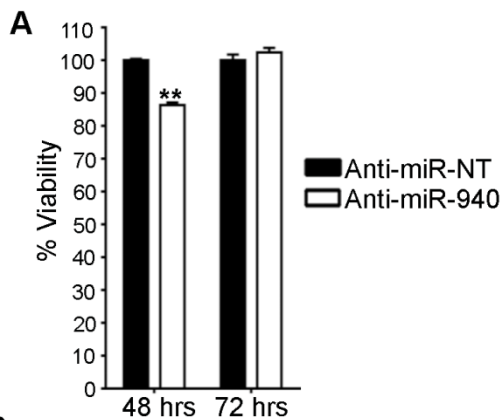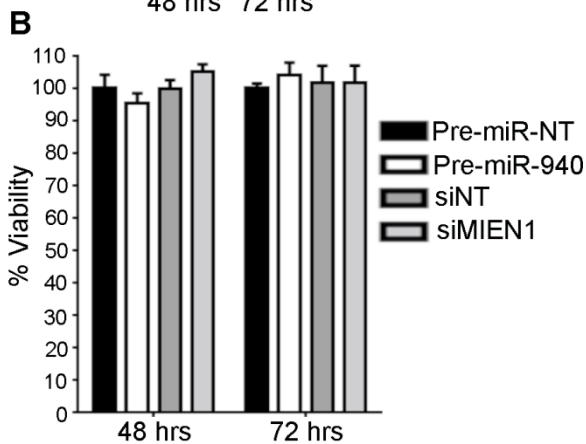

Supplement: MOESM4 [file 9553036]
